# Supplementary material for: Ni(ii)-based coordination polymers for efficient electrocatalytic oxygen evolution reaction
Source: Royal Society of Chemistry journal article supplement (doi:10.1039/c8ra07492e), 2018-01-01
Supplement: c8ra07492e1.pdf [file c8ra07492e1.pdf]

*Electronic Supplementary Information (ESI) for*

**A Ni (II)-based Coordination Polymers for Efficient Electrocatalytic  
Oxygen Evolution Reaction**

Zhi-Qiang Jiang,<sup>a\*</sup> Yu-Feng Li,<sup>a</sup> Xue-Jun Zhu,<sup>a</sup> Jin Lu,<sup>a</sup> Lei Zhang<sup>b</sup> and Tian  
Wen <sup>b\*</sup>

[a] Zhi-Qiang Jiang, Yu-Feng Li, Xue-Jun Zhu, Jin Lu

Deep-processing of Fine Flake Graphite Sichuan Province Key Laboratory of  
Colleges and Universities, Panzhihua University, Panzhihua, Sichuan,  
617000, P. R. China. E-mail: jiangzhiqiang@mail.pzhu.edu.cn

[b] Lei Zhang, T. Wen

School of Chemistry, The University of Melbourne, Parkville, Victoria 3010,  
Australia. E-mail: tian.wen@unimelb.edu.au

## Part I: Experimental Section

### 1. Ni CPs structural determination

Diffraction data of Ni (II) coordinated polymer were collected on a Bruker D8 QUEST single crystal diffractometer equipped with graphite-monochromatic Mo K $\alpha$  radiation ( $\lambda$  = 0.71073 Å) at 273 K. The structure was solved by the direct method and refined by the SHELXTL-2014 software package. The structure determination parameters and crystallographic data are summarized in Table S1. Powder X-ray diffraction (PXRD) analyses were studied on a Rigaku Dmax2500 diffractometer with Cu K $\alpha$  radiation ( $\lambda$  = 1.54056 Å) using a step size of 0.05°. Thermogravimetric analyses (TGA) were tested on a Mettler Toledo TGA/SDTA 851e analyzer using a heating rate of 10 °C/min under N<sub>2</sub> atmosphere. Elemental analyses (EA) for C, H, and N were done on an EA1110 CHNSO CE elemental analyzer.

### 2. Electrochemical Measurements

All electrochemical experiments were performed in a three-electrode glass cell. The data were recorded using a CHI760 D at room temperature. The reference electrode was Ag/AgCl and the counter electrode was a platinum wire. Glassy carbon (GC, surface area = 0.196 cm<sup>2</sup>) was acted as the substrate of working electrodes, on which the Ni based polymers were attached with 0.05 wt% nafion binder and the loading mass of sample is ~0.23 mg cm<sup>-2</sup>. The linear sweep voltammetry (LSV) tests were carried out at a scan rate of 5 mV s<sup>-1</sup>. The measured potentials vs. Ag/AgCl were converted to a reversible hydrogen electrode (RHE) scale via the Nernst equation ( $E_{\text{RHE}} = E_{\text{Ag/AgCl}} + 0.059 \times \text{pH} + 0.213$ ). The Tafel slope was calculated according to Tafel equation ( $\eta = b \cdot \log(j/j_0)$ ).

### 3. Synthesis of Ni CPs

4,4'-Bipyridine (0.11g, 6.41mmol), Ni(ClO<sub>4</sub>)<sub>2</sub>·6H<sub>2</sub>O (0.586g, 1.61mmol) in a water (H<sub>2</sub>O; 5mL) solution were placed in a 23 mL vial. The sample was heated at 130 °C for two days, and then cooled to room-temperature. After washing with distilled water, the blue crystals were obtained (51% yield). EA calc. (%) for C<sub>40</sub>H<sub>36</sub>Cl<sub>2</sub>N<sub>8</sub>NiO<sub>12</sub>: C, 50.51; H, 3.78; N, 11.79; found: C 50.57, H 3.76, N, 11.81.

#### 3.1 Synthesis of Fe@Ni-CPs

Fresh **Ni-CPs** sample was immersed in (NH<sub>4</sub>)<sub>2</sub>SO<sub>4</sub>·FeSO<sub>4</sub>·6H<sub>2</sub>O solution (10 mM) for 4 hours. Further, the obtained **Fe@Ni-CPs** was washed with water and ethanol three times before use.

### 4. Ni-CPs coated on glassy carbon electrode (Ni-CPs@GC)

The as-synthesized **Ni-CPs** was firstly dispersed in the mixture of 1 ml of 0.05 wt.% nafion water solution, and then transferred onto the glassy carbon electrode with a loading amount of  $\sim 0.23 \text{ mg cm}^{-2}$ . The resulting electrode was drying in air for 4 h before use.

#### **4.1 Fe@Ni-CPs coated on glassy carbon electrode (Fe@Ni-CPs@GC)**

The procedure for preparation of **Fe@Ni-CPs@GC** is similar to **Ni-CPs@GC** except for using **Fe@ Ni-CPs** instead of **Ni-CPs**.

#### **4.2 Ru/C coated on glassy carbon electrode (Ru/C@GC)**

The procedure for preparation of **Ru/C@GC** is similar to **Ni-CPs@GC** except for using **Ru/C** in place of **Ni-CPs**.

## Part II: Supplementary Results

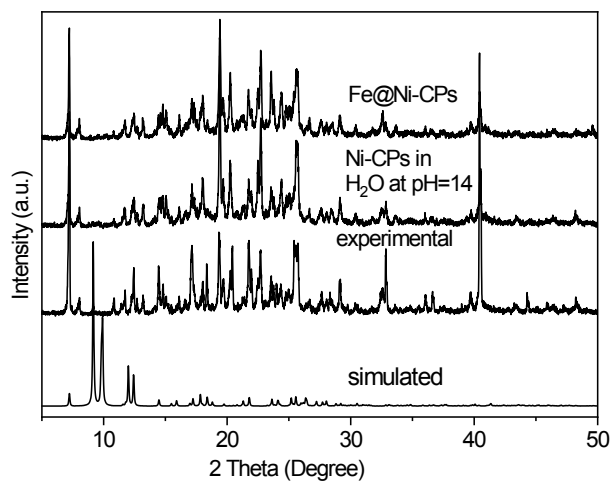

**Figure S1.** The PXRD patterns of Ni CPs under different conditions.

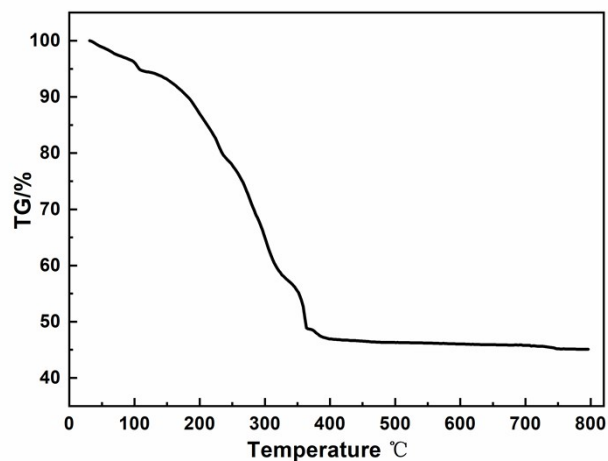

**Figure S2.** Thermogravimetric profiles recorded for Ni-CPs.

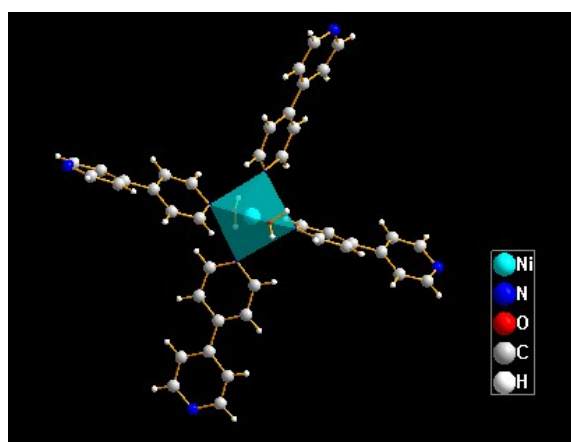

**Figure S3.** The coordination environment of Ni-CPs.

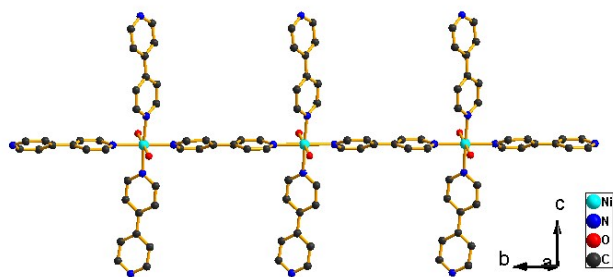

**Figure S4.** The single chain of Ni-CPs.

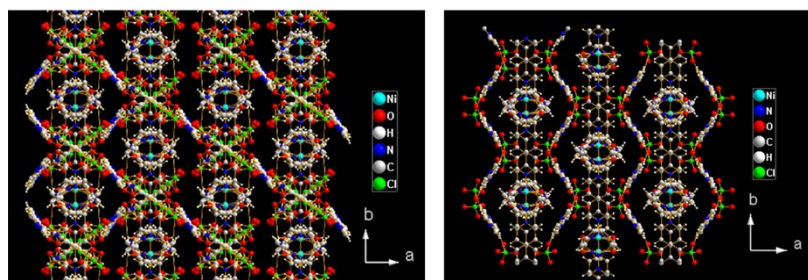

**Figure S5.** The 3D packing of Ni CPs (left: reported, right: this work) .

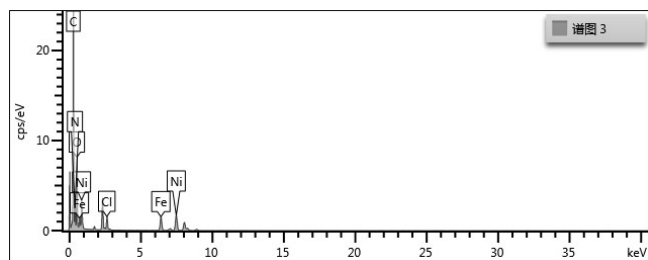

**Figure S6.** EDX of Fe@ Ni- CPs.

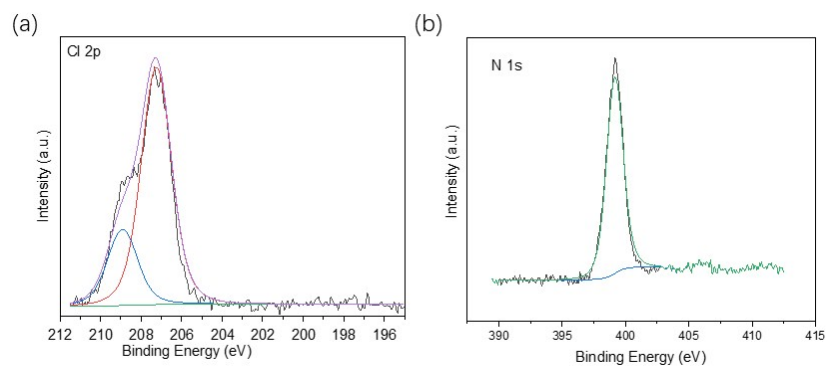

**Figure S7.** XPS spectrum of the Cl 2p (a) and N1s(b).

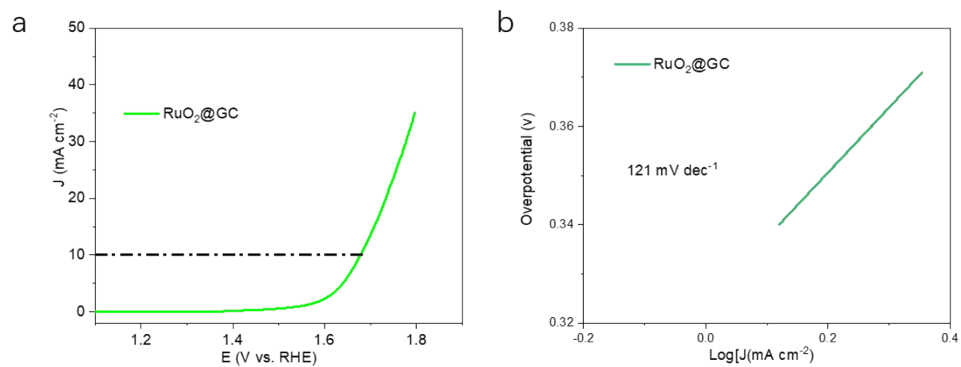

**Figure S8.** (a) LSV curves of RuO<sub>2</sub>/C@GC and (b) Tafel plots of RuO<sub>2</sub>/C at pH = 14.

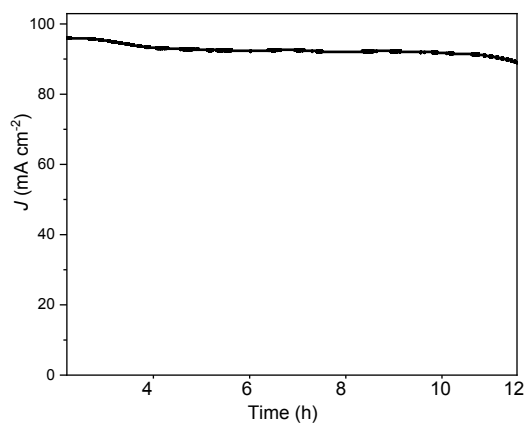

**Figure S9.** Chronoamperometric curves of Fe@ Ni-CPs conducted at 1.55 V.

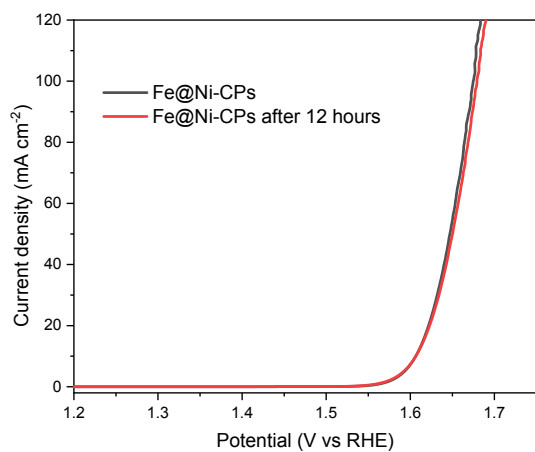

**Figure S10.** LSV of Fe@ Ni-CPs after 12 hours stability test in 1 M KOH aqueous solution.

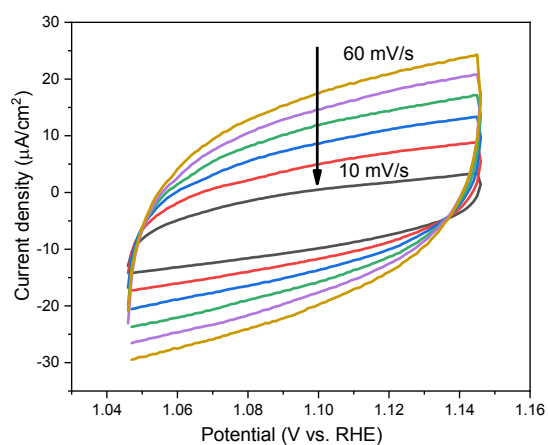

**Figure S11.** CV curves at different scan rates in the range of 1.04 and 1.15 V vs. RHE for Fe@ Ni-CPs.

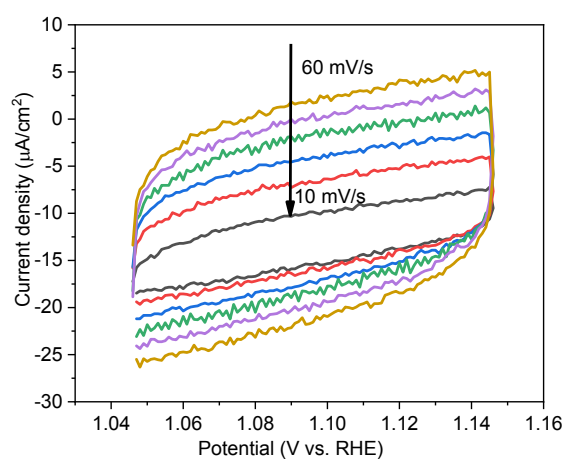

**Figure S12.** CV curves at different scan rates in the range of 1.04 and 1.15 V vs. RHE for Ni-CPs

**Table S1.** Summary of crystallographic data and refinement results.

|                                                           | Ni-CPs                                                                           |
|-----------------------------------------------------------|----------------------------------------------------------------------------------|
| chemical formula                                          | C <sub>40</sub> H <sub>36</sub> Cl <sub>2</sub> N <sub>8</sub> NiO <sub>12</sub> |
| formula mass                                              | 950.36                                                                           |
| Space group                                               | C2/c                                                                             |
| a/Å                                                       | 17.9784(12)                                                                      |
| b/Å                                                       | 11.4346(8)                                                                       |
| c/Å                                                       | 24.4647(17)                                                                      |
| α/°                                                       | 90.00                                                                            |
| β/°                                                       | 92.082(2)                                                                        |
| γ/°                                                       | 90.0                                                                             |
| Volume/Å <sup>3</sup>                                     | 5026.0(6)                                                                        |
| Temperature/K                                             | 273(2)                                                                           |
| Z                                                         | 4                                                                                |
| absorption coefficient (μ/mm <sup>-1</sup> )              | 0.554                                                                            |
| No. of reflections measured                               | 23130                                                                            |
| No. of independent reflections                            | 4962                                                                             |
| R <sub>int</sub>                                          | 0.0401                                                                           |
| GOF on F <sup>2</sup>                                     | 0.997                                                                            |
| R <sub>1</sub> , <sup>a</sup> wR <sub>2</sub> [I > 2σ(I)] | R <sub>1</sub> = 0.1032, wR <sub>2</sub> = 0.3371                                |
| R <sub>1</sub> , wR <sub>2</sub> (all data)               | R <sub>1</sub> = 0.1181, wR <sub>2</sub> = 0.3562                                |
| CCDC Number                                               | 1858717                                                                          |

$$^a R_1 = \sum(|F_o| - |F_c|)/\sum|F_o|, wR_2 = [\sum w(F_o^2 - F_c^2)^2/\sum w(F_o^2)^2]^{0.5}$$



**Table S2.** Comparison of the OER activities of **Fe@Ni-CPs** with reported MOF-based electrocatalysts supported on different substrates.

| Catalyst         | Onset potential (V vs. RHE) | Over-potential at 10 mA cm <sup>-2</sup> (mV vs. RHE) | Tafel Slope (mV dec <sup>-1</sup> ) | Substrate     | Ref              |
|------------------|-----------------------------|-------------------------------------------------------|-------------------------------------|---------------|------------------|
| MAF-X27-OH       | 1.47                        | 292                                                   | 88                                  | Cu Foil       | 1                |
| Co-ZIF-9         | NA                          | 510 at 1 mA cm <sup>-2</sup>                          | 193                                 | FTO glass     | 2                |
| Co-WOC-1         | 1.62                        | 390 at 1 mA cm <sup>-2</sup>                          | 128                                 | GC            | 3                |
| USTA-16          | 1.60                        | 408                                                   | 77                                  | GC            | 4                |
| Co/MIL-100(Fe)   | 1.58                        | 734 (5mA cm <sup>-2</sup> )                           | NA                                  | GC-RDE        | 5                |
| Ni/Fe-BTC        | NA                          | 270                                                   | 43                                  | NF            | 6                |
| Co/MIL-101       | 1.53                        | 477                                                   | 122                                 | GC-RDE        | 7                |
| NiFe-MOF-74      | NA                          | 223                                                   | 76                                  | Ni Foam       | 8                |
| MOF NU-1000      | NA                          | 320                                                   | 59                                  | FTO glass     | 9                |
| CoOx-ZIF/C       | 1.548                       | 318                                                   | 70                                  | Glassy carbon | 10               |
| <b>Ni-CPs</b>    | <b>1.62</b>                 | <b>458</b>                                            | <b>97</b>                           | <b>GC</b>     | <b>This work</b> |
| <b>Fe@Ni-CPs</b> | <b>1.52</b>                 | <b>368</b>                                            | <b>59</b>                           | <b>GC</b>     | <b>This work</b> |

#### References:

- [1] X.-F. Lu, P.-Q. Liao, J.-W. Wang, J.-X. Wu, X.-W. Chen, C.-T. He, J.-P. Zhang, G.-R. Li and X.-M. Chen, *J. Am. Chem. Soc.*, 2016, **138**, 8336.
- [2] S. Wang, Y. Hou, S. Lin and X. Wang, *Nanoscale*, 2014, **6**, 9930.
- [3] J. Jiang, L. Huang, X. Liu and L. Ai, *ACS Appl. Mater. Inter.*, 2017, **9**, 7193.
- [4] L. Wang, Y.-Z. Wu, R. Cao, L.-T. Ren, M.-X. Chen, X. Feng, J.-W. Zhou and B. Wang, *ACS Appl. Mater. Interfaces*, 2016, **8**, 16736.
- [5] B. A. Johnson, A. B. hunia and S. Ott, *Dalton Trans.* 2017, **46**, 1382.
- [6] J. Chi, H. M. Yu, B. W. Qin, L. Fu, J. Jia, B. L. Yi and Z. G. Shao, *ACS Appl. Mater. Interfaces*, 2017, **9**, 464.
- [7] F. Yan, C. Zhu, S. Wang, Y. Zhao, X. Zhang, C. Li and Y. Chen, *J. Mater. Chem. A*, 2016, **4**, 6048.

- [8] J. Xing, K. Guo, Z. Zou, M. Cai, J. Du and C. Xu, *Chem. Commun.*, 2018, **54**, 7046.
- [9] C. Kung, J. E. Mondloch, T. C. Wang, W. Bury, W. Hoffeditz, B. M. Klahr, R. C. Klet, M. J. Pellin, O. K. Farha and J. T. Hupp. *ACS Appl. Mater. Interfaces*, 2015, **7**, 28223.
- [10] S. Dou, C. L. Dong, Z. Hu, Y. C. Huang, J. I. Chen, L. Tao, D. Yan, D. Chen, S. Shen and S. Chou, *Adv. Funct. Mater.*, 2017, **27**, 1702546
